# Supplementary material for: Upfront Chemotherapy Followed by Stereotactic Body Radiation Therapy with or without Surgery in Older Patients with Localized Pancreatic Cancer: A Single Institution Experience and Review of the Literature
Source: MDPI journal article supplement (doi:10.3390/curroncol29010028), 2022-01-11
Supplement: s1 [file s1]

**Supplementary Materials:**

| <b>Supplementary Table 1.</b> Practice patterns and toxicity in older patients based on age cutoffs |                  |                  |                  |                |
|-----------------------------------------------------------------------------------------------------|------------------|------------------|------------------|----------------|
|                                                                                                     | <b>70-75</b>     | <b>75-80</b>     | <b>≥80</b>       | <b>P value</b> |
| <b>Variable</b>                                                                                     | N (% or range)   | N (% or range)   | N (% or range)   |                |
| Total number                                                                                        | 37               | 14               | 6                |                |
| Median age                                                                                          | 72.4 (70.1-74.9) | 77.7 (76.0-79.7) | 80.9 (80.4-84.1) |                |
| <b>Practice patterns</b>                                                                            |                  |                  |                  |                |
| Multi-agent chemotherapy                                                                            | 37 (100)         | 13 (92.9)        | 6 (100)          | 0.239          |
| Chemotherapy regimen                                                                                |                  |                  |                  |                |
| mFFX                                                                                                | 25 (67.6)        | 6 (42.9)         | 0 (0)            | <b>0.002</b>   |
| GnP                                                                                                 | 12 (32.4)        | 6 (42.9)         | 6 (100)          | <b>0.003</b>   |
| Gemcitabine/Capecitabine                                                                            | 0 (0)            | 1 (7.1)          | 0 (0)            | 0.239          |
| Gemcitabine                                                                                         | 0 (0)            | 1 (7.1)          | 0 (0)            | 0.239          |
| Median chemotherapy duration (months)                                                               | 4 (2-18)         | 4 (2-6)          | 4 (2-5)          | 0.279          |
| Surgical Exploration                                                                                | 31 (83.8)        | 9 (64.3)         | 3 (50)           | 0.123          |
| Resected                                                                                            | 28 (75.7)        | 8 (57.1)         | 2 (33.3)         | 0.093          |
| Post-SBRT/surgery chemotherapy                                                                      | 16 (43.2)        | 2 (14.3)         | 1 (16.7)         | 0.080          |
| <b>Toxicity</b>                                                                                     |                  |                  |                  |                |
| Grade 3 chemotherapy toxicity                                                                       | 8 (21.6)         | 3 (21.4)         | 1 (16.7)         | 0.960          |
| Clavien-Dindo 3b toxicity                                                                           | 0 (0)            | 1 (7.1)          | 1 (16.7)         | 0.095          |
| Grade 3 radiation toxicity                                                                          | 1 (2.7)          | 2 (14.3)         | 0 (0)            | 0.243          |

Abbreviations: mFFX, modified FOLFIRINOX; GnP, gemcitabine plus nab-paclitaxel. Bold text indicates P-value < 0.05

| <b>Supplementary Table 2.</b> Univariate and multivariable analyses of local progression-free survival |      |           |              |     |        |   |
|--------------------------------------------------------------------------------------------------------|------|-----------|--------------|-----|--------|---|
|                                                                                                        | UVA  |           |              | MVA |        |   |
|                                                                                                        | HR   | 95% CI    | P            | HR  | 95% CI | P |
| Age (years)                                                                                            | 1.11 | 0.99-1.23 | 0.083        |     |        |   |
| Sex (male vs female)                                                                                   | 1.59 | 0.67-3.79 | 0.296        |     |        |   |
| ECOG (0 vs 1-2)                                                                                        | 1.35 | 0.57-3.22 | 0.492        |     |        |   |
| ACE-27 (0-1 vs 2-3)                                                                                    | 0.75 | 0.22-2.62 | 0.657        |     |        |   |
| Disease extent (BRPC vs LAPC)                                                                          | 2.31 | 0.93-5.76 | 0.062        |     |        |   |
| Tumor location (head vs other)                                                                         | 1.15 | 0.48-2.73 | 0.750        |     |        |   |
| Induction CT duration (> 4 vs ≤ 4 months)                                                              | 0.99 | 0.42-2.37 | 0.999        |     |        |   |
| Induction CT (mFFX vs GnP)                                                                             | 1.48 | 0.58-3.77 | 0.412        |     |        |   |
| Resected (yes vs no)                                                                                   | 0.47 | 0.17-1.24 | 0.127        |     |        |   |
| Baseline CA 19-9 (U/ml)                                                                                | 1.00 | 0.99-1.00 | 0.071        |     |        |   |
| Pre-SBRT CA 19-9 (U/ml)                                                                                | 1.00 | 1.00-1.00 | <b>0.037</b> |     |        |   |

|                                            |      |           |       |  |  |  |
|--------------------------------------------|------|-----------|-------|--|--|--|
| Baseline Total Bilirubin (mg/dl)           | 1.08 | 0.95-1.18 | 0.216 |  |  |  |
| Post-SBRT/surgery chemotherapy (yes vs no) | 0.43 | 0.16-1.11 | 0.081 |  |  |  |

Abbreviations: ECOG, Eastern Cooperative Oncology Group; ACE-27, adult comorbidity evaluation-27; BRPC, borderline resectable pancreatic cancer; LAPC, locally advanced pancreatic cancer; mFFX, modified FOLFIRINOX; GnP, gemcitabine plus nab-paclitaxel; CA 19-9, cancer antigen 19-9; SBRT, stereotactic body radiation therapy. Bold text indicates P-value < 0.05

| <b>Supplementary Table 3.</b> Univariate and multivariable analyses of distant metastasis-free survival |      |           |                  |      |           |              |
|---------------------------------------------------------------------------------------------------------|------|-----------|------------------|------|-----------|--------------|
|                                                                                                         | UVA  |           |                  | MVA  |           |              |
|                                                                                                         | HR   | 95% CI    | P                | HR   | 95% CI    | P            |
| Age (years)                                                                                             | 1.05 | 0.96-1.14 | 0.275            |      |           |              |
| Sex (male vs female)                                                                                    | 1.50 | 0.79-2.87 | 0.217            |      |           |              |
| ECOG (0 vs 1-2)                                                                                         | 0.47 | 0.22-1.01 | 0.052            |      |           |              |
| ACE-27 (0-1 vs 2-3)                                                                                     | 0.34 | 0.16-0.72 | <b>0.005</b>     | 0.46 | 0.20-1.03 | 0.060        |
| Disease extent (BRPC vs LAPC)                                                                           | 1.40 | 0.74-2.66 | 0.301            |      |           |              |
| Tumor location (head vs other)                                                                          | 0.97 | 0.51-1.87 | 0.929            |      |           |              |
| Induction CT duration (> 4 vs ≤ 4 months)                                                               | 0.86 | 0.45-1.65 | 0.654            |      |           |              |
| Induction CT (mFFX vs GnP)                                                                              | 1.18 | 0.60-2.31 | 0.628            |      |           |              |
| Resected (yes vs no)                                                                                    | 0.22 | 0.11-0.46 | <b>&lt;0.001</b> | 0.33 | 0.14-0.77 | <b>0.010</b> |
| Baseline CA 19-9 (U/ml)                                                                                 | 0.99 | 0.99-1.00 | 0.894            |      |           |              |
| Pre-SBRT CA 19-9 (U/ml)                                                                                 | 1.00 | 0.99-1.00 | 0.674            |      |           |              |
| Baseline Total Bilirubin (mg/dl)                                                                        | 0.99 | 0.87-1.09 | 0.909            |      |           |              |
| Post-SBRT/surgery chemotherapy (yes vs no)                                                              | 0.47 | 0.23-0.94 | <b>0.032</b>     | 0.61 | 0.28-1.32 | 0.207        |

Abbreviations: ECOG, Eastern Cooperative Oncology Group; ACE-27, adult comorbidity evaluation-27; BRPC, borderline resectable pancreatic cancer; LAPC, locally advanced pancreatic cancer; mFFX, modified FOLFIRINOX; GnP, gemcitabine plus nab-paclitaxel; CA 19-9, cancer antigen 19-9; SBRT, stereotactic body radiation therapy. Bold text indicates P-value < 0.05

| <b>Supplementary Table 4.</b> Toxicity in older patients and rest of the source population |                             |                                            |         |
|--------------------------------------------------------------------------------------------|-----------------------------|--------------------------------------------|---------|
|                                                                                            | Older patients (≥ 70 years) | Rest of the source population (< 70 years) | P value |
|                                                                                            | N (%)                       | N (%)                                      |         |
| <b>Total Number</b>                                                                        | 57                          | 125                                        |         |
| <b>Toxicity</b>                                                                            |                             |                                            |         |
| Grade 3 chemotherapy toxicity                                                              | 12 (21.1)                   | 17 (13.6)                                  | 0.211   |
| Clavien-Dindo 3b toxicity                                                                  | 2 (5.3)                     | 3 (3.5)                                    | 0.651   |
| Grade 3 radiation toxicity                                                                 | 3 (5.3)                     | 4 (3.2)                                    | 0.513   |

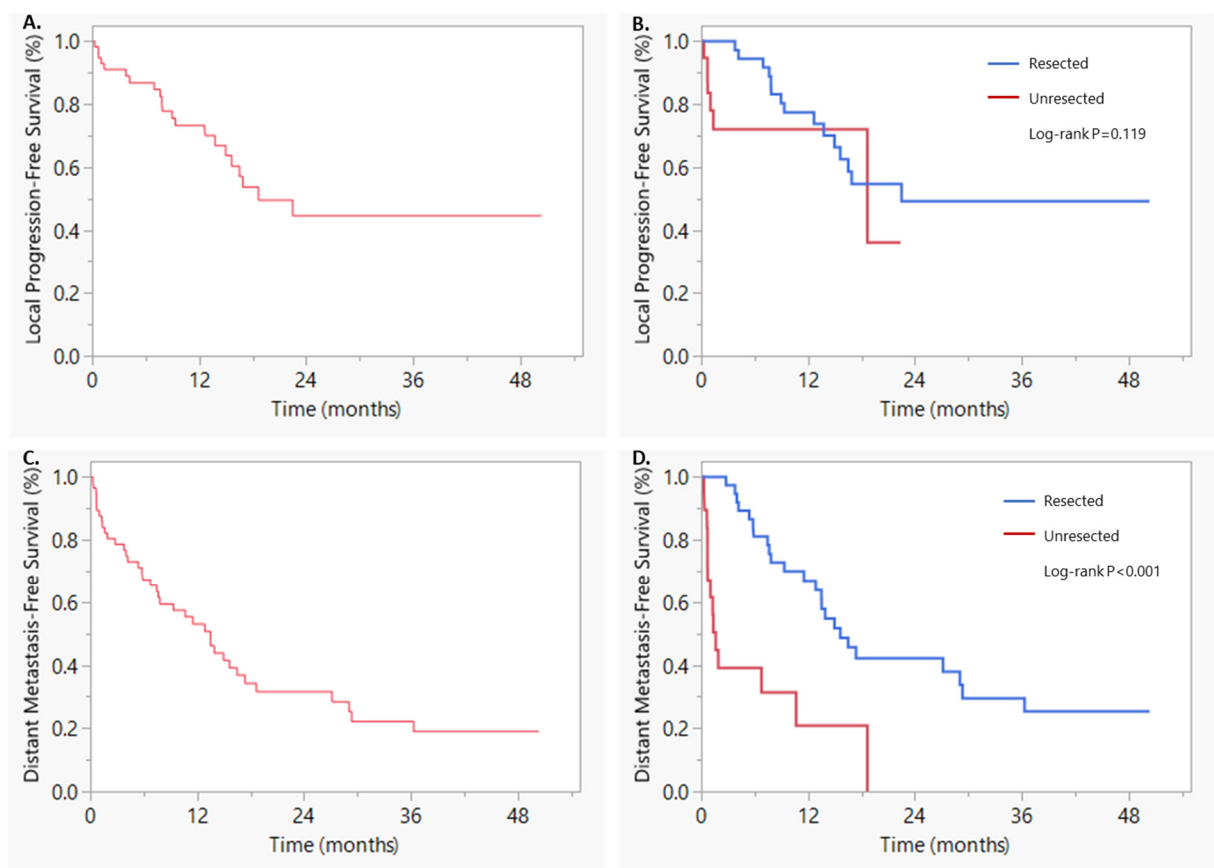

**Supplementary Figure 1.** Kaplan Meier curves of A) local progression-free survival, B) local progression-free survival based on resection status, C) distant metastasis-free survival, and D) distant metastasis-free survival based on resection status.
